# Supplementary material for: Single-cell profiling defines the prognostic benefit of CD39high tissue resident memory CD8+ T cells in luminal-like breast cancer
Source: PubMed Central journal article supplement (PMC8458450; doi:10.1038/s42003-021-02595-z), 2021-09-22
Supplement: 42003_2021_2595_MOESM2_ESM.pdf [file 42003_2021_2595_MOESM2_ESM.pdf]

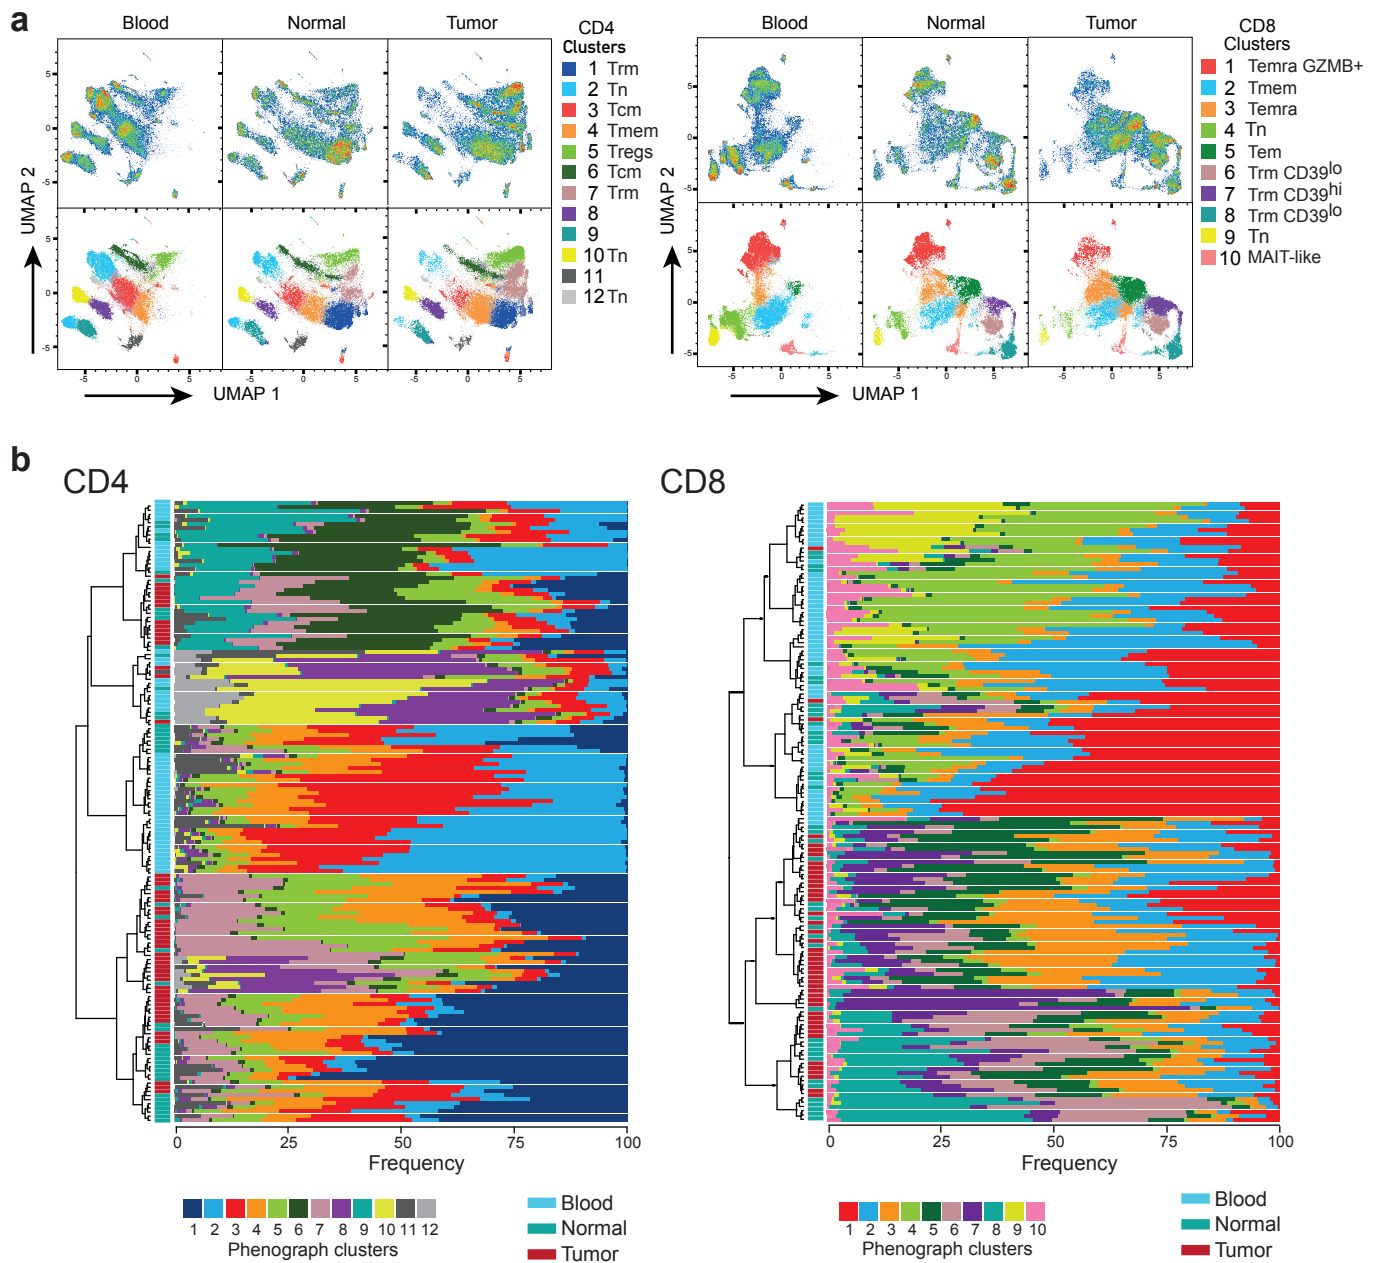

**Supplementary Figure 1.** Peripheral blood, breast tissue and tumor samples from BC patients display a different T cell immune composition. **a.** UMAP analysis of concatenated CD4+ and CD8+ T cells (1,000 cells/sample) from peripheral blood, normal breast tissue and tumor samples from 54 early breast cancer patients (top rows), and color-coded UMAP depicting clusters identified by PhenoGraph (bottom rows). **b.** Hierarchical metaclustering of the frequencies of the 12 CD4+ and 10 CD8+ T cell PhenoGraph clusters, identified as in Figure 1B, from single peripheral blood, normal breast tissue, and tumor samples.

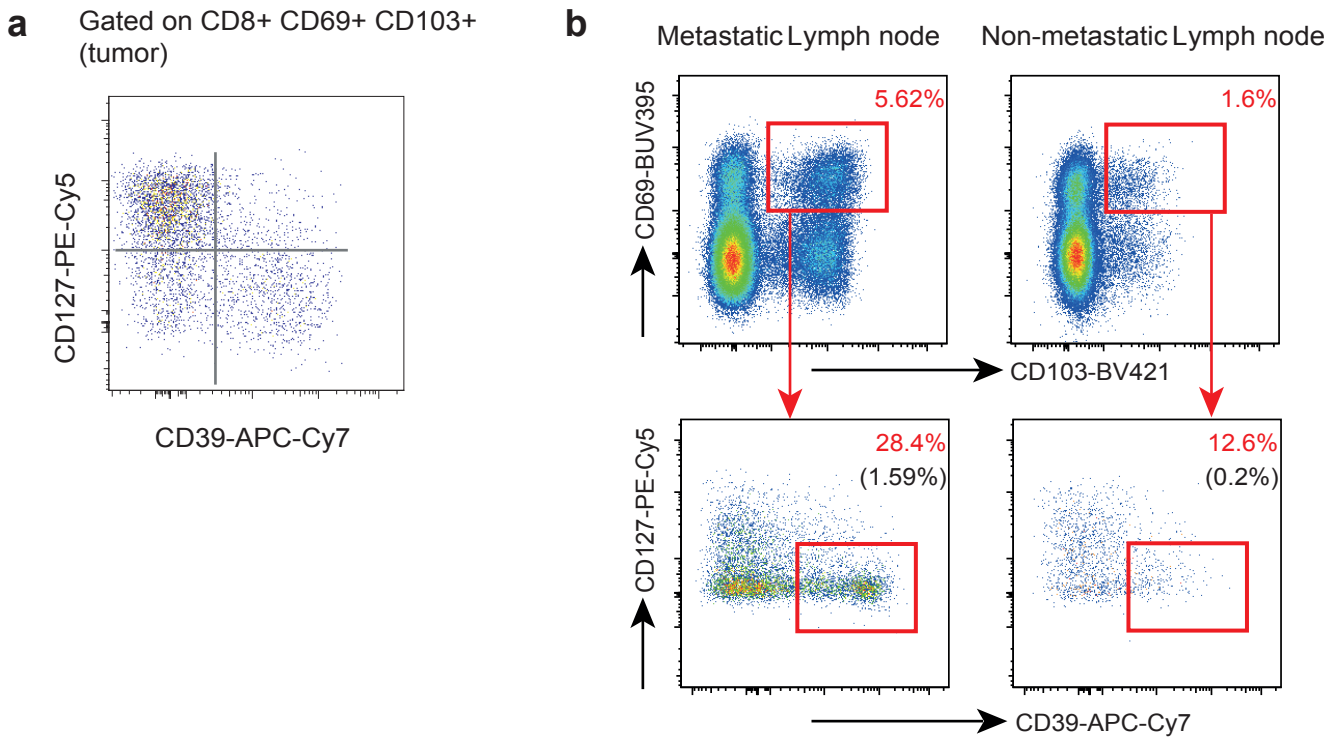

**Supplementary Figure 2.** BC tumors and metastatic lymph nodes show enrichment of CD127- CD39hi CD8+ Trm cells. **a.** Representative flow cytometry plot showing the different Trm populations identified by CD127 and CD39 expression from a BC tumor. **b.** Representative flow cytometric analysis showing the frequency of CD127- CD39hi among CD69+ CD103+ Trm from metastatic and non-metastatic lymph node samples. Numbers in the dot plots indicate the percentage of cells identified by the gates while those in brackets indicate the percentage of CD127- CD39hi Trm among total CD8+ cells. Cumulative data from the entire cohort are shown in Fig. 2D.

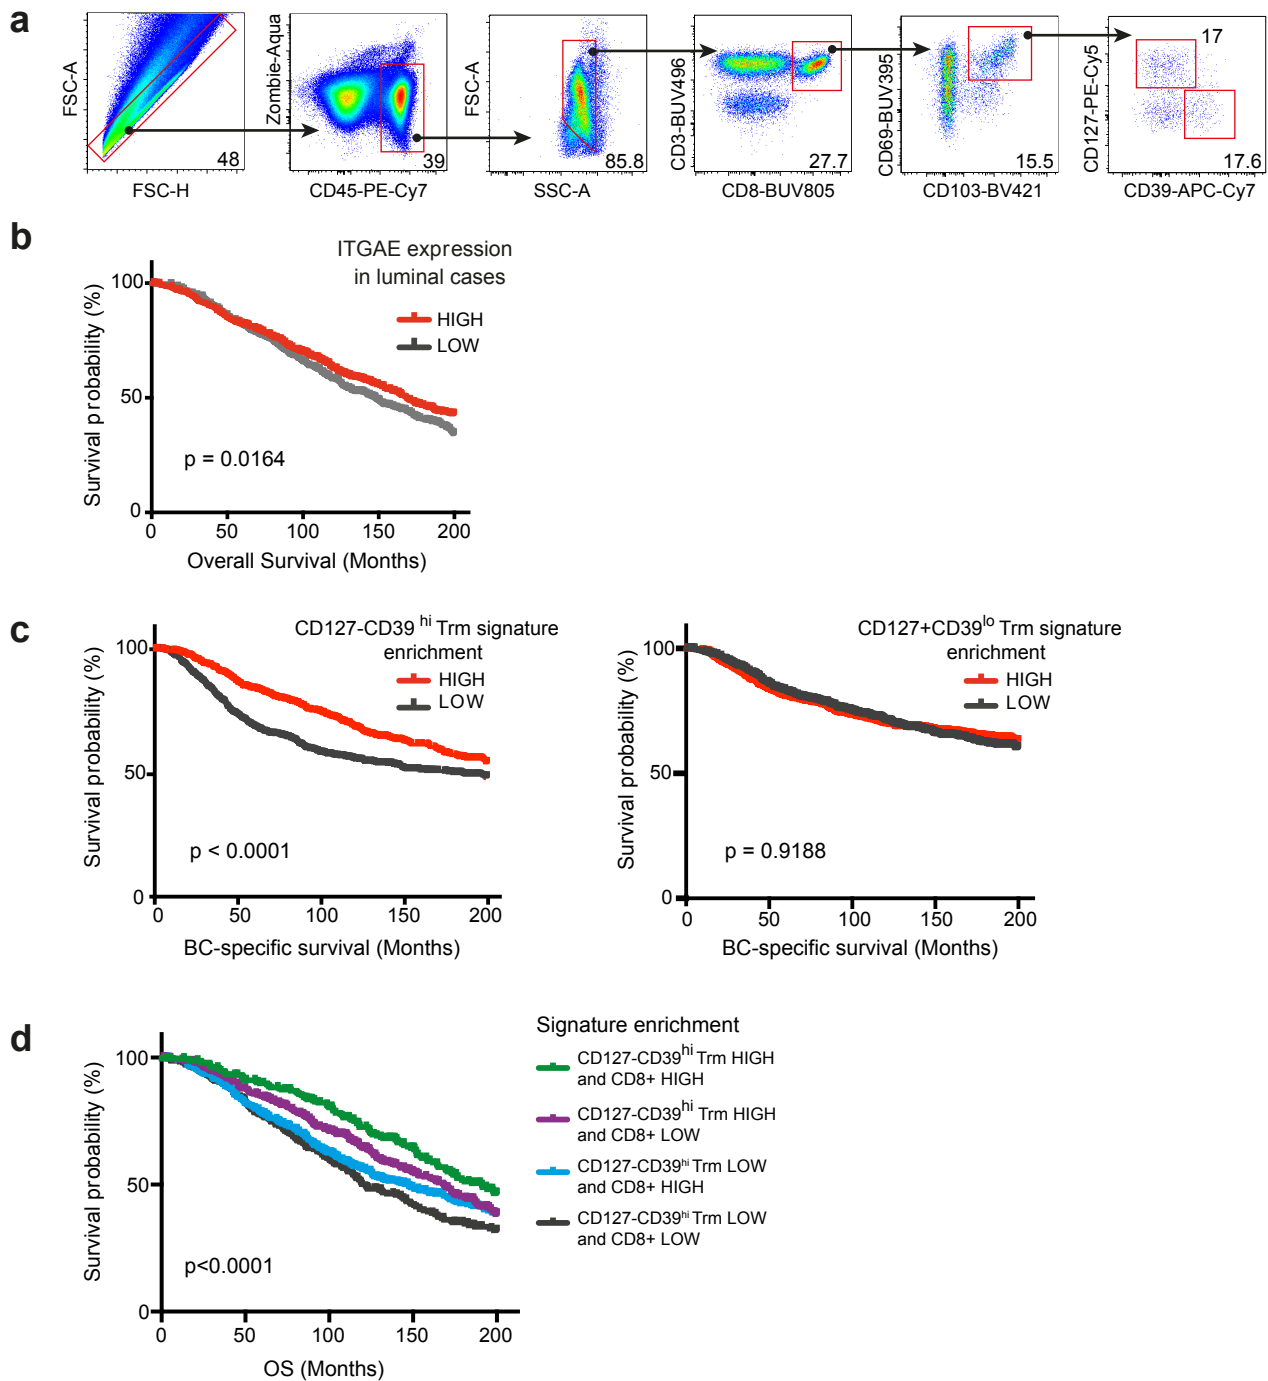

**Supplementary Figure 3.** Identification of CD8<sup>+</sup> Trm infiltrating BC with differential expression of CD127 and CD39. **a.** Flow cytometric gating strategy for the identification of CD127<sup>+</sup> CD39<sup>lo</sup> and CD127-CD39<sup>hi</sup> within CD69<sup>+</sup> CD103<sup>+</sup> CD8<sup>+</sup> Trm cells used for cell sorting. Numbers in the dot plots indicate the percentage of cells identified by the gates. **b.** Kaplan-Meier OS curves for luminal-like BC cases in the METABRIC consortium data set ( $n=1,436$ ) according to high or low expression of ITGAE. **c.** Kaplan-Meier BC-specific survival curves in the METABRIC consortium data set ( $n=1,894$ ). In B and C, groups were defined and data were displayed as in Fig. 3C. **d.** Kaplan-Meier overall survival (OS) curves in the METABRIC consortium data set in luminal-like BCs ( $n=1,436$ ) according to high or low enrichment of CD127- CD39<sup>hi</sup> Trm, integrated with CD8A expression. The mean z-score value was used to classify tumor samples into LOW and HIGH expression groups. P values were calculated applying the Log-rank (Mantel-Cox) test.

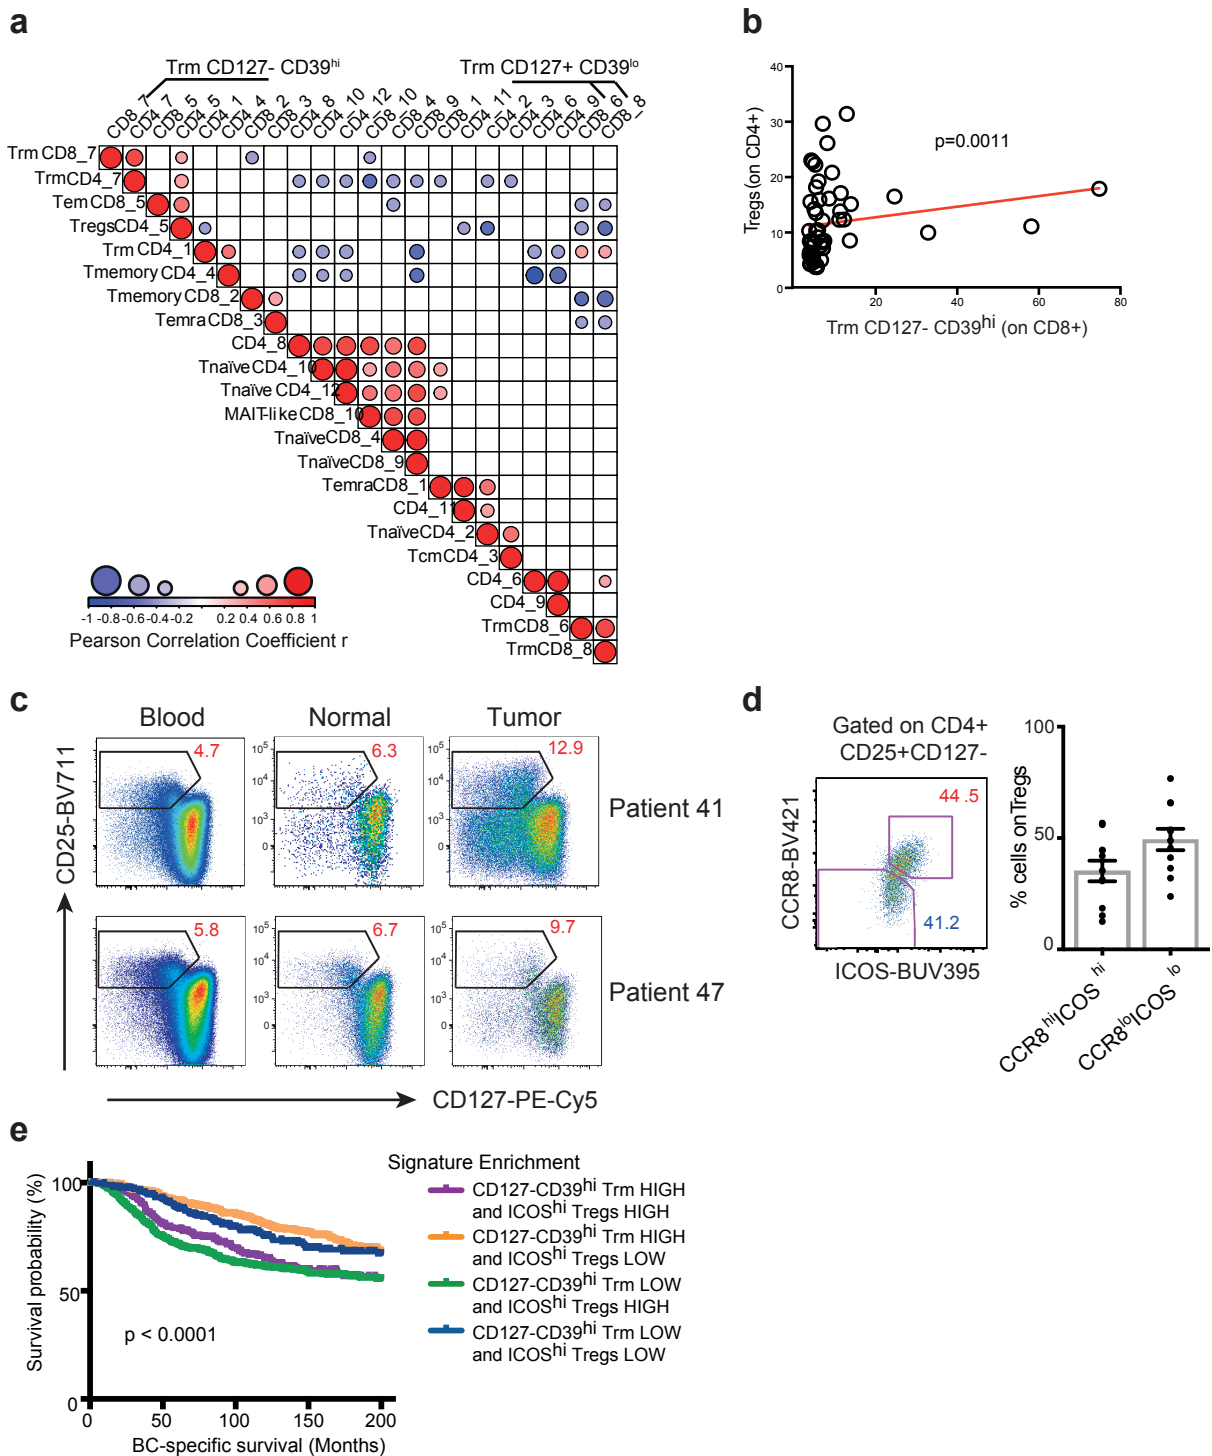

**Supplementary Figure 4. CD4<sup>+</sup> Treg and CD8<sup>+</sup> Trm subset relationship in BC.** **a.** Correlogram showing Pearson correlation between frequencies of CD4<sup>+</sup> (T4) and CD8<sup>+</sup> (T8) PhenoGraph clusters (obtained as in Fig. 1B) in tumor samples from BC patients (n=47 biologically independent samples). Non-significant correlations (p>0.05) were left blank. **b.** Spearman correlation between frequencies of intratumoral CD127<sup>-</sup> CD39<sup>hi</sup> Trm among total CD8<sup>+</sup> and CD127<sup>-</sup> CD25<sup>+</sup> Treg cells among total CD4<sup>+</sup> as determined by manual gating (r=0.4369, p=0.0011; n= 47). **c.** Representative gating strategy for the isolation of CD127<sup>-</sup> CD25<sup>+</sup> Treg cells in different tissue specimens from two patients. **d.** Representative gating strategy for the identification CCR8<sup>hi</sup> ICOS<sup>hi</sup> and CCR8<sup>lo</sup> ICOS<sup>lo</sup> Tregs in a tumor and summary plot of data from n=11 patients (mean±SEM; 3 independent experiments). **e.** Kaplan-Meier BC-specific survival curves in the METABRIC consortium data set (n=1,894). Groups were defined and data were displayed as in Fig. 4f, g. In c and d, numbers in the flow cytometry plots indicate the percentage of cells identified by the gate.

**Supplementary Table 1. Fluorescently-conjugated monoclonal antibodies used in the study**

| Specificity  | Fluorochrome | Clone     | Manufacturer | Cat. #        | Lot. #     | Panel           |
|--------------|--------------|-----------|--------------|---------------|------------|-----------------|
| TCRgd        | PerCP-Cy5.5  | B1        | BioLegend    | 331224        | B260893    | 27-parameter    |
| NKG2A        | FITC         | REA110    | Miltenyi     | 130-113-568   | 5190115118 | 27-parameter    |
| CD39         | APC-H7       | A1        | BioLegend    | 328226        | B260740    | 27-parameter    |
| GZMB         | APC-R700     | GB11      | BD           | 560213        | 7339825    | 27-parameter    |
| TIGIT        | APC          | A15153G   | BioLegend    | 372706        | B259593    | 27-parameter    |
| CD25         | BV786        | 2A3       | BD           | 741035        | 9011676    | 27-parameter    |
| CCR7         | BV711        | 150503    | BD           | 566602        | 8248691    | 27-parameter    |
| OX40         | BV650        | ACT35     | BD           | 563658        | 8288968    | 27-parameter    |
| CD161        | BV605        | HP-3G10   | BioLegend    | 339916        | B245752    | 27-parameter    |
| CD27         | BV570        | O323      | BioLegend    | 302825        | B244350    | 27-parameter    |
| CD11b        | BV510        | ICRF44    | BioLegend    | 301334        | B244424    | 27-parameter    |
| PD-1         | BV480        | EH12.1    | BD           | 566112        | 8235507    | 27-parameter    |
| CD103        | BV421        | Ber-ACT8  | BioLegend    | 350214        | B263432    | 27-parameter    |
| CD8          | BUV805       | SK1       | BD           | 564912        | 8127840    | 27-parameter    |
| CD28         | BUV737       | Cd28.2    | BD           | 564438        | 8236693    | 27-parameter    |
| HLA-DR       | BUV661       | G46-6     | BD           | 565073        | 7249926    | 27-parameter    |
| CD4          | BUV615       | SK3       | BD           | 624297        | 8191540    | 27-parameter    |
| CD45RA       | BUV563       | HI100     | BD           | 565702        | 8277539    | 27-parameter    |
| CD3          | BUV496       | UCHT1     | BD           | 564809        | 8107587    | 27-parameter    |
| CD69         | BUV395       | FN50      | BD           | 564364        | 8242749    | 27-parameter    |
| CD45         | PE-Cy7       | HI30      | BioLegend    | 304016        | B264588    | 27-parameter    |
| CD56         | PE-CY5.5     | CMSSB     | eBioscience  | 35-0567-42    | 4348287    | 27-parameter    |
| CD127        | PE-CY5       | eBioRDR5  | eBioscience  | 15-1278-42    | 2025251    | 27-parameter    |
| CX3CR1       | PECF594      | 2A9-1     | BioLegend    | 341624        | B236542    | 27-parameter    |
| GZMK         | PE           | GM6C3     | Santa Cruz   | sc-56125      | E2214      | 27-parameter    |
| CD3          | FITC         | HIT3a     | BD           | 555339        | 7095651    | Total RNAseq    |
| CD8          | BV786        | RPA-T8    | BD           | 563823        | 8080524    | Total RNAseq    |
| CD39         | APC-Cy7      | A1        | BioLegend    | 328225        | B231987    | Total RNAseq    |
| CD45RA       | BV480        | HI100     | BD           | 566114        | 7160937    | Total RNAseq    |
| CD69         | PE-Cy7       | FN50      | BD           | 557745        | 5205544    | Total RNAseq    |
| CD127        | PE-Cy5       | eBioRDR5  | eBioscience  | 15-1278-42    | 2025251    | Total RNAseq    |
| CD103        | BV421        | Ber-ACT8  | BioLegend    | 350214        | B244354    | Total RNAseq    |
| CD25         | BV711        | BC96      | BioLegend    | 302636        | B242666    | Tregs panel     |
| CD127        | PE-CY5       | eBioRDR5  | eBioscience  | 2021-12-23    | 2025251    | Tregs panel     |
| HLA-DR       | BUV661       | G46-6     | BD           | 565073        | 7104603    | Tregs panel     |
| CD39         | APC-Cy7      | A1        | BioLegend    | 328226        | B60740     | Tregs panel     |
| ICOS         | BUV395       | DX29      | BD           | 564777        | 7075884    | Tregs panel     |
| OX40         | BV650        | ACT35     | BD           | 563658        | 8288968    | Tregs panel     |
| CD3          | BUV496       | UCHT1     | BD           | 564809        | 8296578    | Tregs panel     |
| CCR8         | BV421        | 433H      | BD           | 566379        | 8214515    | Tregs panel     |
| IRF4         | PE           | 3E4       | eBioscience  | BMS12-9858-80 | 4299177    | Tregs panel     |
| FOXP3        | AF647        | 259D/57   | BD           | 560045        | 6273737    | Tregs panel     |
| HLA-DR       | APC-R700     | G46-6     | BD           | 565127        | 7076576    | Cytokines panel |
| CD69         | PE-Cy7       | MOPC-21   | BD           | 557745        | 5205544    | Cytokines panel |
| CD3          | FITC         | UCHT1     | BD           | 555339        | 7095651    | Cytokines panel |
| IL-2         | APC          | MQ1-17H12 | BD           | 554567        | 7110605    | Cytokines panel |
| IFN $\gamma$ | BV711        | B27       | BD           | 564039        | 7026849    | Cytokines panel |

TNF $\alpha$   
CD107a

BUV395  
BB630

MAB11  
H4A3

BD  
BD

563996  
624294

6224667  
9345335

Cytokines panel  
Cytokines panel

**Supplementary Table 2. Characteristics of BC patients used for high-dimensional flow cytometry immunophenotyping**

| Characteristic            | N (%)        |
|---------------------------|--------------|
| All pts                   | 54           |
| Median age, years (range) | 59,5 (32-90) |
| Surgery type              |              |
| Lumpectomy                | 31(57)       |
| Mastectomy                | 23(43)       |
| Hystology                 |              |
| IDC                       | 45 (83)      |
| ILC                       | 8 (15)       |
| Other                     | 1 (2)        |
| pT                        |              |
| 1                         | 13(24)       |
| 2                         | 36 (67)      |
| 3                         | 4 (7)        |
| 4                         | 1 (2)        |
| pN                        |              |
| 0                         | 34 (63)      |
| 1                         | 6 (11)       |
| 2                         | 7 (13)       |
| 3                         | 4 (7)        |
| X                         | 3 (6)        |
| ER                        |              |
| positive                  | 47 (87)      |
| negative                  | 7 (13)       |
| PgR                       |              |
| positive                  | 42 (78)      |
| negative                  | 12 (22)      |
| HER2                      | 27 (50)      |
| 0                         |              |
| 1+                        | 5(9)         |
| 2+ FISH positive          | 3 (6)        |
| 2+ FISH negative          | 10(18)       |
| 3+                        | 9(17)        |
| Ki-67                     |              |
| 1-20%                     | 22 (41)      |
| >20%                      | 32 (59)      |
| LVI                       |              |
| present extensive         | 13 (24)      |
| present focal             | 9 (17)       |
| absent                    | 31 (57)      |
| unknown                   | 1 (2)        |

**Supplementary table 3. Differentially expressed genes in CD127+ CD39lo vs CD127- CD39hi Trm CD8+ T cells**

| CD127+ CD39lo      |             |             | CD127- CD39hi       |             |             |
|--------------------|-------------|-------------|---------------------|-------------|-------------|
| Ensembl gene IDs   | Gene Symbol | FDR         | Ensembl gene IDs    | Gene Symbol | FDR         |
| ENSG00000168685.15 | IL7R        | 0,001758864 | ENSG00000074410.14  | CA12        | 0,045689295 |
| ENSG00000161835.11 | GRASP       | 0,045689295 | ENSG00000116299.17  | KIAA1324    | 0,045689295 |
| ENSG00000139278.10 | GLIPR1      | 0,021662031 | ENSG00000113739.10  | STC2        | 0,045689295 |
| ENSG00000126353.3  | CCR7        | 0,045689295 | ENSG00000003989.17  | SLC7A2      | 0,038829594 |
| ENSG00000074966.11 | TXK         | 0,045689295 | ENSG00000185630.18  | PBX1        | 0,037942403 |
| ENSG00000131459.13 | GFPT2       | 0,033969175 | ENSG00000085733.16  | CTTN        | 0,048797799 |
| ENSG00000126860.11 | EV12A       | 0,033969175 | ENSG00000064651.14  | SLC12A2     | 0,045689295 |
| ENSG00000090382.6  | LYZ         | 0,033969175 | ENSG00000162989.5   | KCNJ3       | 0,045689295 |
| ENSG00000173391.9  | OLR1        | 0,033969175 | ENSG00000120549.18  | KIAA1217    | 0,033969175 |
| ENSG00000162676.12 | GFI1        | 0,035841539 | ENSG00000127954.12  | STEAP4      | 0,043544845 |
| ENSG00000138378.19 | STAT4       | 0,033969175 | ENSG00000150687.12  | PRSS23      | 0,045689295 |
| ENSG00000034053.14 | APBA2       | 0,033969175 | ENSG00000144218.19  | AFF3        | 0,033969175 |
| ENSG00000154127.10 | UBASH3B     | 0,045689295 | ENSG00000152661.9   | GJA1        | 0,033969175 |
| ENSG0000013445.10  | SIPA1       | 0,043544845 | ENSG00000172403.11  | SYNPO2      | 0,041534862 |
| ENSG00000107742.13 | SPOCK2      | 0,033969175 | ENSG00000111057.11  | KRT18       | 0,033969175 |
| ENSG00000075884.14 | ARHGAP15    | 0,041419443 | ENSG00000124766.7   | SOX4        | 0,045689295 |
| ENSG00000078589.13 | P2RY10      | 0,033969175 | ENSG00000173848.19  | NET1        | 0,033969175 |
| ENSG00000115085.13 | ZAP70       | 0,033969175 | ENSG00000134909.18  | ARHGAP32    | 0,045689295 |
| ENSG00000117091.10 | CD48        | 0,033969175 | ENSG00000175356.13  | SCUBE2      | 0,033969175 |
| ENSG000000169508.7 | GPR183      | 0,033969175 | ENSG000000035403.17 | VCL         | 0,035581052 |
| ENSG00000101265.16 | RASSF2      | 0,038829594 | ENSG00000167306.20  | MYO5B       | 0,045689295 |
| ENSG00000079335.20 | CDC14A      | 0,043544845 | ENSG00000163697.17  | APBB2       | 0,033969175 |
| ENSG00000105717.14 | PBX4        | 0,035841539 | ENSG00000083307.12  | GRHL2       | 0,035669498 |
| ENSG00000170638.9  | TRABD       | 0,045689295 | ENSG00000160862.13  | AZGP1       | 0,033969175 |
| ENSG00000134539.17 | KLRD1       | 0,033969175 | ENSG00000163435.16  | ELF3        | 0,038829594 |
| ENSG00000167895.14 | TMC8        | 0,033969175 | ENSG00000142192.21  | APP         | 0,033969175 |
| ENSG00000056558.11 | TRAF1       | 0,033969175 | ENSG00000039068.19  | CDH1        | 0,033969175 |
| ENSG00000173369.16 | C1QB        | 0,045689295 | ENSG00000053747.16  | LAMA3       | 0,045689295 |
| ENSG00000198821.10 | CD247       | 0,041534862 | ENSG00000061676.15  | NCKAP1      | 0,038400194 |
| ENSG00000196154.12 | S100A4      | 0,045689295 | ENSG00000261150.2   | EPPK1       | 0,047069845 |
| ENSG00000026025.16 | VIM         | 0,033969175 | ENSG00000119888.10  | EPCAM       | 0,038829594 |
| ENSG00000121966.6  | CXCR4       | 0,033969175 | ENSG00000041353.10  | RAB27B      | 0,045689295 |
| ENSG00000150637.9  | CD226       | 0,045689295 | ENSG00000184292.7   | TACSTD2     | 0,045689295 |
| ENSG00000118503.15 | TNFAIP3     | 0,038829594 | ENSG00000083857.14  | FAT1        | 0,033969175 |
| ENSG00000171310.11 | CHST11      | 0,033969175 | ENSG00000138771.16  | SHROOM3     | 0,033969175 |
| ENSG00000168918.14 | INPP5D      | 0,033969175 | ENSG00000118513.19  | MYB         | 0,045619308 |
| ENSG00000010810.17 | FYN         | 0,033969175 | ENSG00000104413.18  | ESRP1       | 0,033969175 |
| ENSG00000135074.15 | ADAM19      | 0,045689295 | ENSG00000082175.15  | PGR         | 0,033969175 |
| ENSG00000091592.16 | NLRP1       | 0,033969175 | ENSG00000130635.15  | COL5A1      | 0,045689295 |
| ENSG00000151883.18 | PARP8       | 0,033969175 | ENSG00000166145.14  | SPINT1      | 0,035715039 |
| ENSG00000139112.11 | GABARAPL1   | 0,045619308 | ENSG00000054793.14  | ATP9A       | 0,033969175 |
| ENSG00000124813.23 | RUNX2       | 0,035669498 | ENSG00000140443.15  | IGF1R       | 0,033969175 |
| ENSG00000182568.17 | SATB1       | 0,038829594 | ENSG00000117595.12  | IRF6        | 0,045689295 |
| ENSG00000069667.16 | RORA        | 0,033969175 | ENSG00000196208.14  | GREB1       | 0,033969175 |
| ENSG00000158050.5  | DUSP2       | 0,033969175 | ENSG00000128849.10  | CGNL1       | 0,038829594 |
| ENSG00000105122.13 | RASAL3      | 0,035669498 | ENSG00000142949.17  | PTPRF       | 0,033969175 |
| ENSG00000162511.8  | LAPTM5      | 0,033969175 | ENSG00000185008.17  | ROBO2       | 0,038829594 |
| ENSG00000184922.14 | FMNL1       | 0,033969175 | ENSG00000135862.6   | LAMC1       | 0,033969175 |
| ENSG00000152495.11 | CAMK4       | 0,045619308 | ENSG00000172037.14  | LAMB2       | 0,033969175 |
| ENSG00000110934.12 | BIN2        | 0,033969175 | ENSG00000078114.18  | NEBL        | 0,033969175 |
| ENSG00000090924.15 | PLEKHG2     | 0,045689295 | ENSG00000133026.12  | MYH10       | 0,045619308 |
| ENSG00000145819.18 | ARHGAP26    | 0,033969175 | ENSG00000046604.13  | DSG2        | 0,033969175 |
| ENSG00000157514.16 | TSC22D3     | 0,038829594 | ENSG00000151892.14  | GFRA1       | 0,038829594 |
| ENSG00000172716.16 | SLFN11      | 0,046851729 | ENSG00000166483.11  | WEE1        | 0,038400194 |
| ENSG00000110848.8  | CD69        | 0,042747554 | ENSG00000124171.9   | PARD6B      | 0,031307691 |
| ENSG00000154822.18 | PLCL2       | 0,045689295 | ENSG00000115112.8   | TFCP2L1     | 0,045689295 |
| ENSG00000077150.20 | NFKB2       | 0,035841539 | ENSG00000170381.14  | SEMA3E      | 0,043544845 |
| ENSG00000136286.16 | MYO1G       | 0,038737052 | ENSG00000125398.8   | SOX9        | 0,033969175 |
| ENSG00000105329.10 | TGFB1       | 0,033969175 | ENSG00000164128.7   | NPY1R       | 0,038829594 |
| ENSG00000059804.16 | SLC2A3      | 0,033969175 | ENSG00000111799.21  | COL12A1     | 0,033969175 |
| ENSG00000145779.8  | TNFAIP8     | 0,045689295 | ENSG00000108244.16  | KRT23       | 0,045689295 |
| ENSG00000171522.6  | PTGER4      | 0,033969175 | ENSG00000117525.14  | F3          | 0,044387716 |
| ENSG00000141506.13 | PIK3R5      | 0,045689295 | ENSG00000134827.8   | TCN1        | 0,045619308 |
| ENSG00000196735.12 | HLA-DQA1    | 0,045689295 | ENSG00000182993.5   | C12orf60    | 0,033969175 |
| ENSG00000115165.10 | CYTIP       | 0,038829594 | ENSG00000186340.15  | THBS2       | 0,033969175 |



|                    |          |             |
|--------------------|----------|-------------|
| ENSG00000142347.19 | MYO1F    | 0,038400194 |
| ENSG00000076928.17 | ARHGEF1  | 0,038829594 |
| ENSG00000043462.12 | LCP2     | 0,038829594 |
| ENSG00000170571.12 | EMB      | 0,035841539 |
| ENSG00000113263.12 | ITK      | 0,035669498 |
| ENSG00000135905.19 | DOCK10   | 0,034733814 |
| ENSG00000133639.5  | BTG1     | 0,045689295 |
| ENSG00000101445.10 | PPP1R16B | 0,041419443 |
| ENSG00000158805.12 | ZNF276   | 0,045689295 |
| ENSG00000184588.18 | PDE4B    | 0,045689295 |
| ENSG00000020633.18 | RUNX3    | 0,035715039 |
| ENSG00000125354.23 | SEPTIN6  | 0,043544845 |
| ENSG00000185477.5  | GPRIN3   | 0,045689295 |
| ENSG00000089820.15 | ARHGAP4  | 0,045689295 |
| ENSG00000104660.19 | LEPROTL1 | 0,038829594 |
| ENSG00000072818.12 | ACAP1    | 0,045689295 |
| ENSG00000168421.13 | RHOH     | 0,047725875 |
| ENSG00000164674.15 | SYTL3    | 0,045689295 |
| ENSG00000102760.13 | RGCC     | 0,043544845 |
| ENSG00000105639.18 | JAK3     | 0,045689295 |
| ENSG00000180353.11 | HCLS1    | 0,038829594 |
| ENSG00000048740.18 | CELF2    | 0,045689295 |
| ENSG00000137265.15 | IRF4     | 0,045689295 |
| ENSG00000081320.11 | STK17B   | 0,045689295 |
| ENSG00000186469.8  | GNG2     | 0,045689295 |
| ENSG00000100241.21 | SBF1     | 0,045689295 |
| ENSG00000114841.17 | DNAH1    | 0,045689295 |
| ENSG00000123329.19 | ARHGAP9  | 0,045527888 |
| ENSG00000198851.9  | CD3E     | 0,045689295 |
| ENSG00000170525.21 | PFKFB3   | 0,041419443 |
| ENSG00000136167.14 | LCP1     | 0,045689295 |
| ENSG00000127152.18 | BCL11B   | 0,045619308 |
| ENSG00000113448.19 | PDE4D    | 0,045689295 |
| ENSG00000058063.16 | ATP11B   | 0,043544845 |
| ENSG00000140368.13 | PSTPIP1  | 0,048950799 |
| ENSG00000102879.15 | CORO1A   | 0,045689295 |
| ENSG00000123146.20 | ADGRE5   | 0,043165295 |
| ENSG00000138670.17 | RASGEF1B | 0,045689295 |
| ENSG00000164691.17 | TAGAP    | 0,045689295 |
| ENSG00000083457.12 | ITGAE    | 0,045689295 |
| ENSG00000100100.13 | PIK3IP1  | 0,045689295 |
| ENSG00000147251.15 | DOCK11   | 0,045689295 |
| ENSG00000185811.19 | IKZF1    | 0,045689295 |
| ENSG00000072786.13 | STK10    | 0,048657751 |
| ENSG00000082074.18 | FYB1     | 0,045689295 |
| ENSG00000122862.5  | SRGN     | 0,045689295 |
| ENSG00000118985.16 | ELL2     | 0,045689295 |
| ENSG00000153563.15 | CD8A     | 0,045689295 |
| ENSG00000116852.14 | KIF21B   | 0,046607041 |
| ENSG00000213949.10 | ITGA1    | 0,045689295 |
| ENSG00000143924.19 | EML4     | 0,048657751 |
| ENSG00000116824.5  | CD2      | 0,049542759 |

|                    |       |             |
|--------------------|-------|-------------|
| ENSG00000104332.12 | SFRP1 | 0,033969175 |
|--------------------|-------|-------------|

**Supplementary Table 4. Characteristics of BC patients donating lymph node specimens**

| Characteristic            | N (%)      |
|---------------------------|------------|
| All pts                   | 13         |
| Median age, years (range) | 56 (38-82) |
| Surgery type              |            |
| Lumpectomy                | 6 (46)     |
| Mastectomy                | 7 (54)     |
| Hystology                 |            |
| IDC                       | 13 (100)   |
| pT                        |            |
| 1                         | 2 (15)     |
| 2                         | 10 (77)    |
| 3                         | 1 (8)      |
| pN                        |            |
| 1                         | 5 (38)     |
| 2                         | 4 (31)     |
| 3                         | 4 (31)     |
| ER                        |            |
| positive                  | 10 (77)    |
| negative                  | 3 (23)     |
| PgR                       |            |
| positive                  | 8 (62)     |
| negative                  | 5 (38)     |
| HER2                      |            |
| 0                         | 6 (46)     |
| 1+                        | 1 (8)      |
| 2+ FISH positive          | 2 (15)     |
| 2+ FISH negative          | 2 (15)     |
| 3+                        | 2 (15)     |
| Ki-67                     |            |
| 1-15%                     | 4 (31)     |
| >15%                      | 9 (69)     |
| LVI                       |            |
| present extensive         | 6 (46)     |
| present focal             | 2 (15)     |
| absent                    | 5 (38)     |

**Supplementary Table 5. Characteristics of BC patients used for RNA-seq experiment**

| Characteristic            | N (%)      |
|---------------------------|------------|
| All pts                   | 6          |
| Median age, years (range) | 50 (38-81) |
| Surgery type              |            |
| Lumpectomy                | 2 (33)     |
| Mastectomy                | 4 (66)     |
| Hystology                 |            |
| IDC                       | 4 (100)    |
| pT                        |            |
| 1                         | 2 (33)     |
| 2                         | 4 (66)     |
| pN                        |            |
| 0                         | 4 (66)     |
| 1                         | 2 (33)     |
| ER                        |            |
| positive                  | 6 (100)    |
| PgR                       |            |
| positive                  | 6 (100)    |
| HER2                      |            |
| 0                         | 2 (33)     |
| 1+                        | 1 (17)     |
| 2+ FISH positive          | 1 (17)     |
| 2+ FISH negative          | 1 (17)     |
| 3+                        | 1 (17)     |
| Ki-67                     |            |
| 1-15%                     | 2 (33)     |
| >15%                      | 4 (66)     |
| LVI                       |            |
| present extensive         | 3 (50)     |
| absent                    | 3 (50)     |
